# Supplementary material for: Tissue-resident memory CAR T cells with stem-like characteristics display enhanced efficacy against solid and liquid tumors
Source: PubMed Central journal article supplement — Cell Rep Med. 2023 May 23;4(6):101053. doi: 10.1016/j.xcrm.2023.101053 (PMC10313923; doi:10.1016/j.xcrm.2023.101053), 2023-05-23
Supplement: mmc1.pdf [file mmc1.pdf]

**Cell Reports Medicine, Volume 4**

**Supplemental information**

**Tissue-resident memory CAR T cells with  
stem-like characteristics display enhanced  
efficacy against solid and liquid tumors**

**In-Young Jung, Estela Noguera-Ortega, Robert Bartoszek, Sierra M. Collins, Erik Williams, Megan Davis, Julie K. Jadowsky, Gabriela Plesa, Donald L. Siegel, Anne Chew, Bruce L. Levine, Shelley L. Berger, Edmund K. Moon, Steven M. Albelda, and Joseph A. Fraietta**

**A** Experimental Design

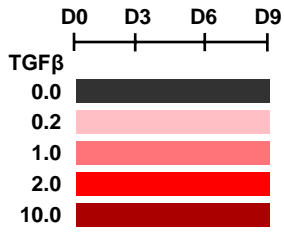

**B** CD103<sup>+</sup>

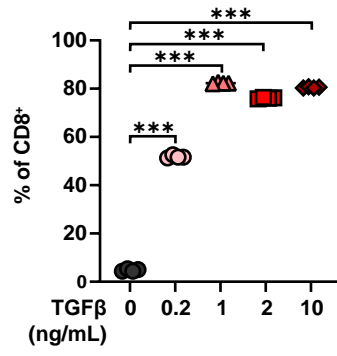

CD103<sup>+</sup>CD39<sup>+</sup>

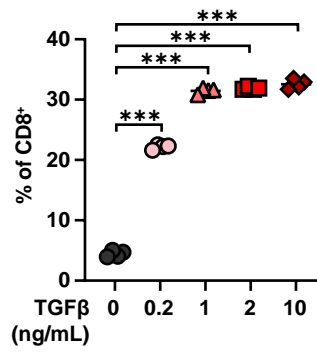

**C** CAR-T Expansion

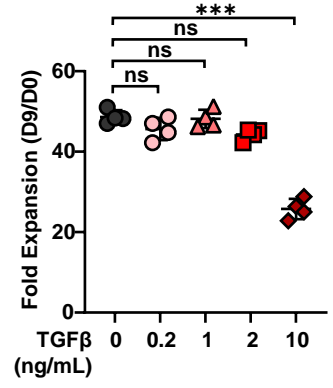

**D** Experimental Design

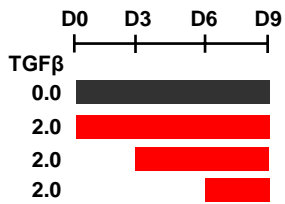

**E** CD103<sup>+</sup>

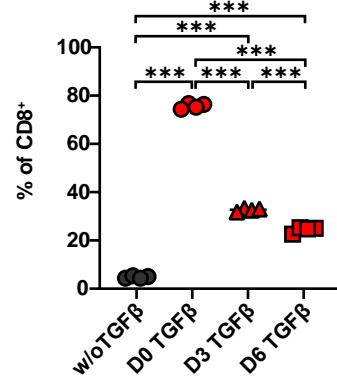

CD103<sup>+</sup>CD39<sup>+</sup>

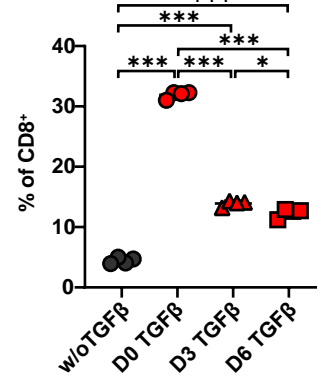

**F** CAR-T Expansion

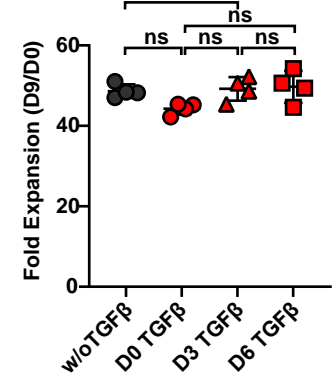

**Supplementary Figure 1. Optimization of CAR-T<sub>RM</sub> culture conditions. Related to Figure 1.** (A) Schematic of optimizing TGF- $\beta$  concentration. (B) Frequencies of CD103<sup>+</sup> and CD103<sup>+</sup>CD39<sup>+</sup> CD8<sup>+</sup> CAR T-cells with 0, 0.2, 1, 2, 10 ng/mL TGF- $\beta$  added during CAR T-cell manufacturing. (C) Fold CAR T-cell expansion during manufacturing with TGF- $\beta$  concentration as indicated in panel A. (D) Schematic of optimizing duration of TGF- $\beta$  exposure. (E) Frequencies of CD103<sup>+</sup> and CD103<sup>+</sup>CD39<sup>+</sup> CD8<sup>+</sup> CAR T-cells with TGF- $\beta$  added at different timepoints during CAR T-cell manufacturing. (F) Fold CAR T-cell expansion during manufacturing with TGF- $\beta$  added on different timepoints as indicated in panel D. One-way ANOVA,  $n = 4$  biological replicates. \* $P < 0.05$ , \*\* $P < 0.01$ , \*\*\* $P < 0.001$ , ns.: not significant.

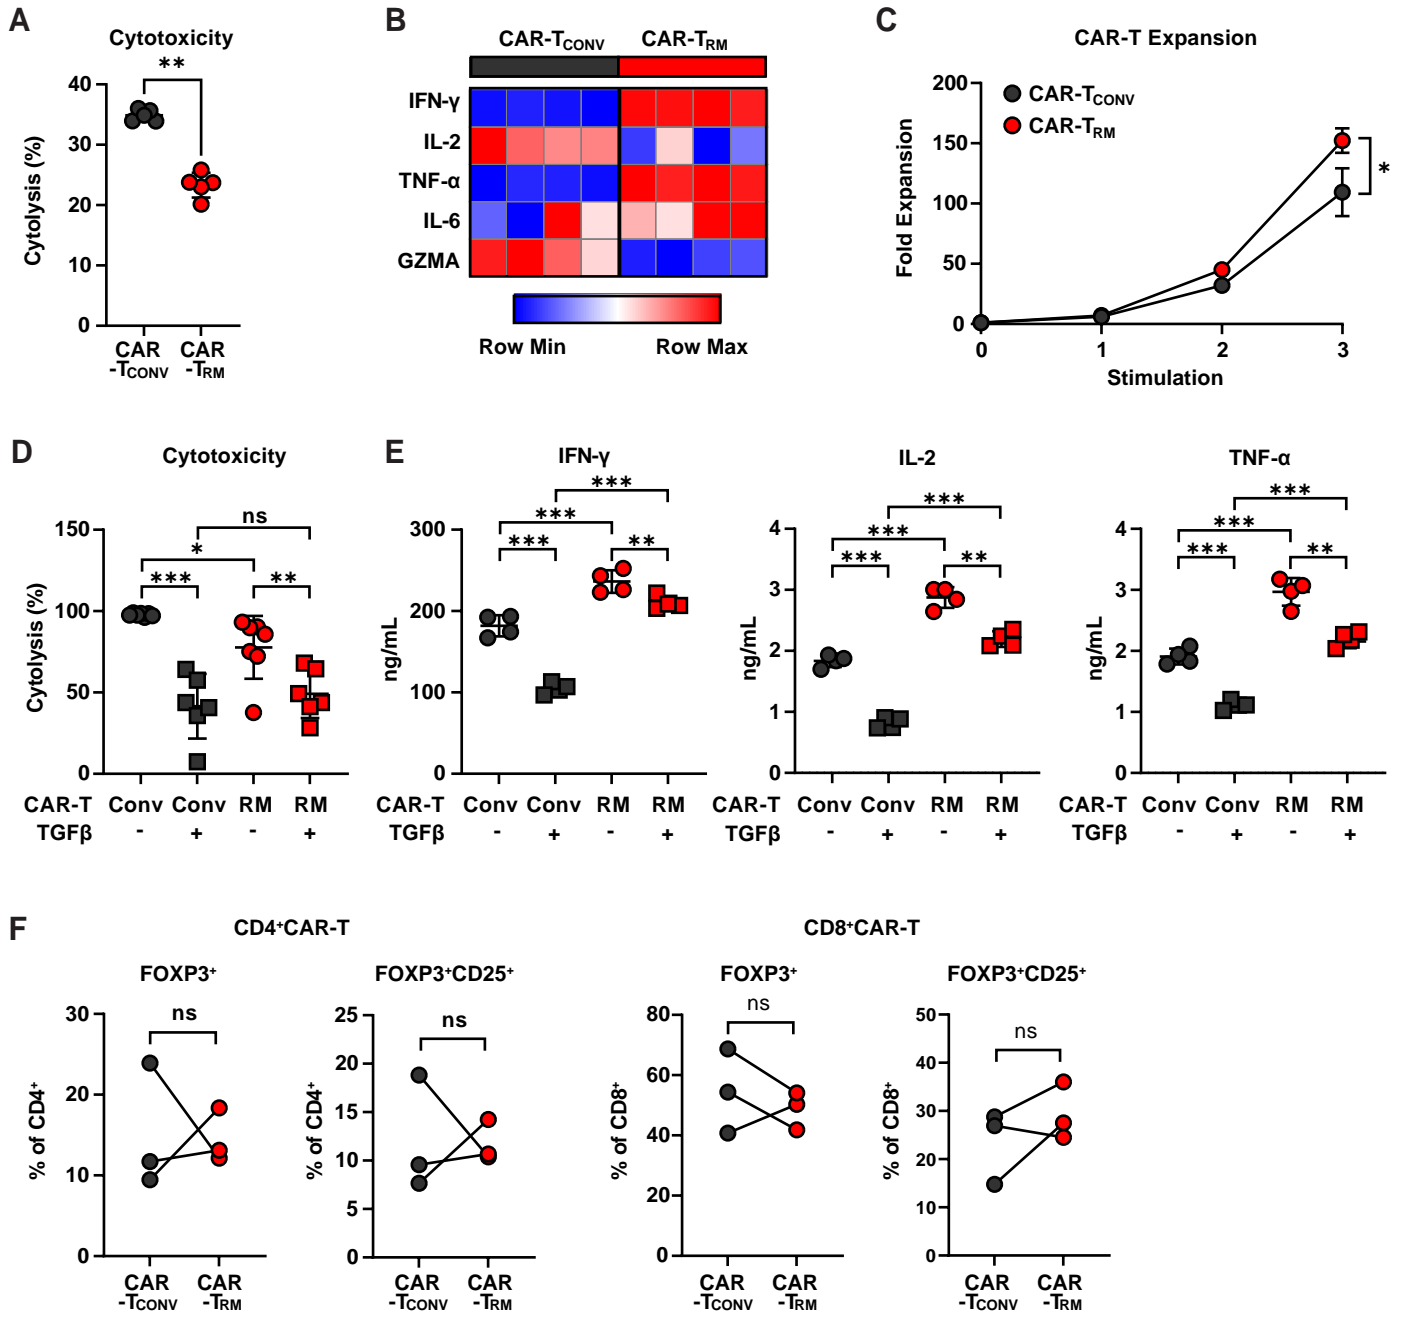

**Supplementary Figure 2. Characterization of CAR-T<sub>RM</sub> cells. Related to Figure 1.**

(A) M5 CAR T-cells were isolated after three consecutive tumor challenges and co-cultured with Capan-2 target cells at an effector to target ratio of 1:2. Cytotoxic capacity at 7-hours post-coculture is shown (Mann-Whitney test,  $n = 5$  biological replicates). (B) Cytokine production after a second challenge with AsPC1 tumor cells. (C) Fold CAR T-cell expansion during a restimulation assay (Mann-Whitney test,  $n = 4$  biological replicates). Experiments in panels B-C were conducted using CAR T-cells manufactured from different healthy donors. Figures display representative results from one donor. (D, E) M5 CAR T-cells were incubated with Capan-2 target cells at an effector to target ratio of 1:3 in presence or absence of 2 ng/mL TGF $\beta$ . The experiments were performed using CAR T-cells generated from individual healthy donors/biological replicates. (D) Cytolytic activity of CAR T-cells 4-days post-coculture. (E) Effector cytokine production 24-hours after co-incubation (one-way ANOVA,  $n = 4$  biological replicates). (F) Frequencies of FOXP3<sup>+</sup> and FOXP3<sup>+</sup>CD25<sup>+</sup> CAR T-cells after manufacturing (paired  $t$ -test,  $n = 3$  biological replicates). \* $P < 0.05$ , \*\* $P < 0.01$ , \*\*\* $P < 0.001$ , ns.: not significant.

# MSigDB\_Hallmark\_2020

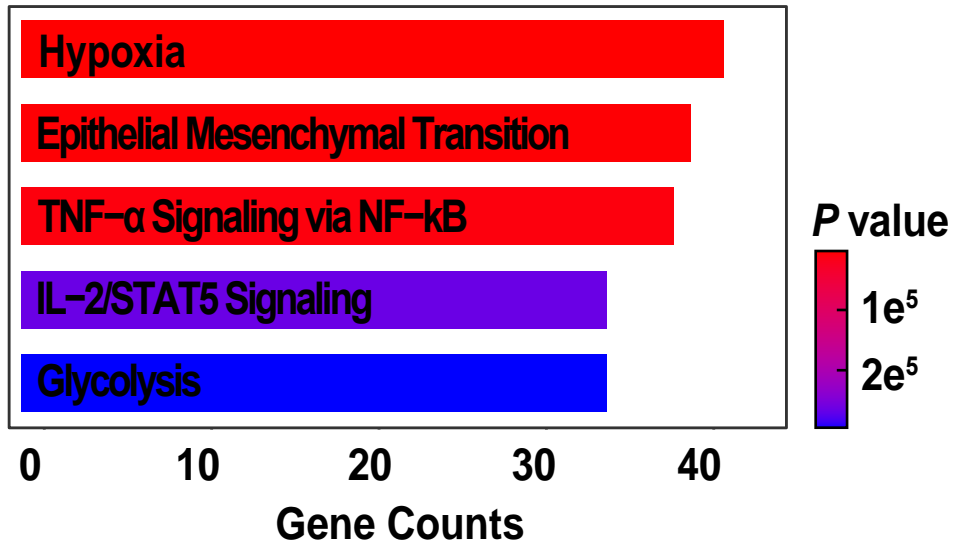

**Supplementary Figure 3. Top pathways enriched in CAR-T<sub>RM</sub> cells. Related to Figure 2.**

Pathway analysis using Enrichr was carried out with genes upregulated in CD8<sup>+</sup> CAR-T<sub>RM</sub> cells compared to CD8<sup>+</sup> CAR-T<sub>CONV</sub> cells (MSigDB\_Hallmark\_2020).

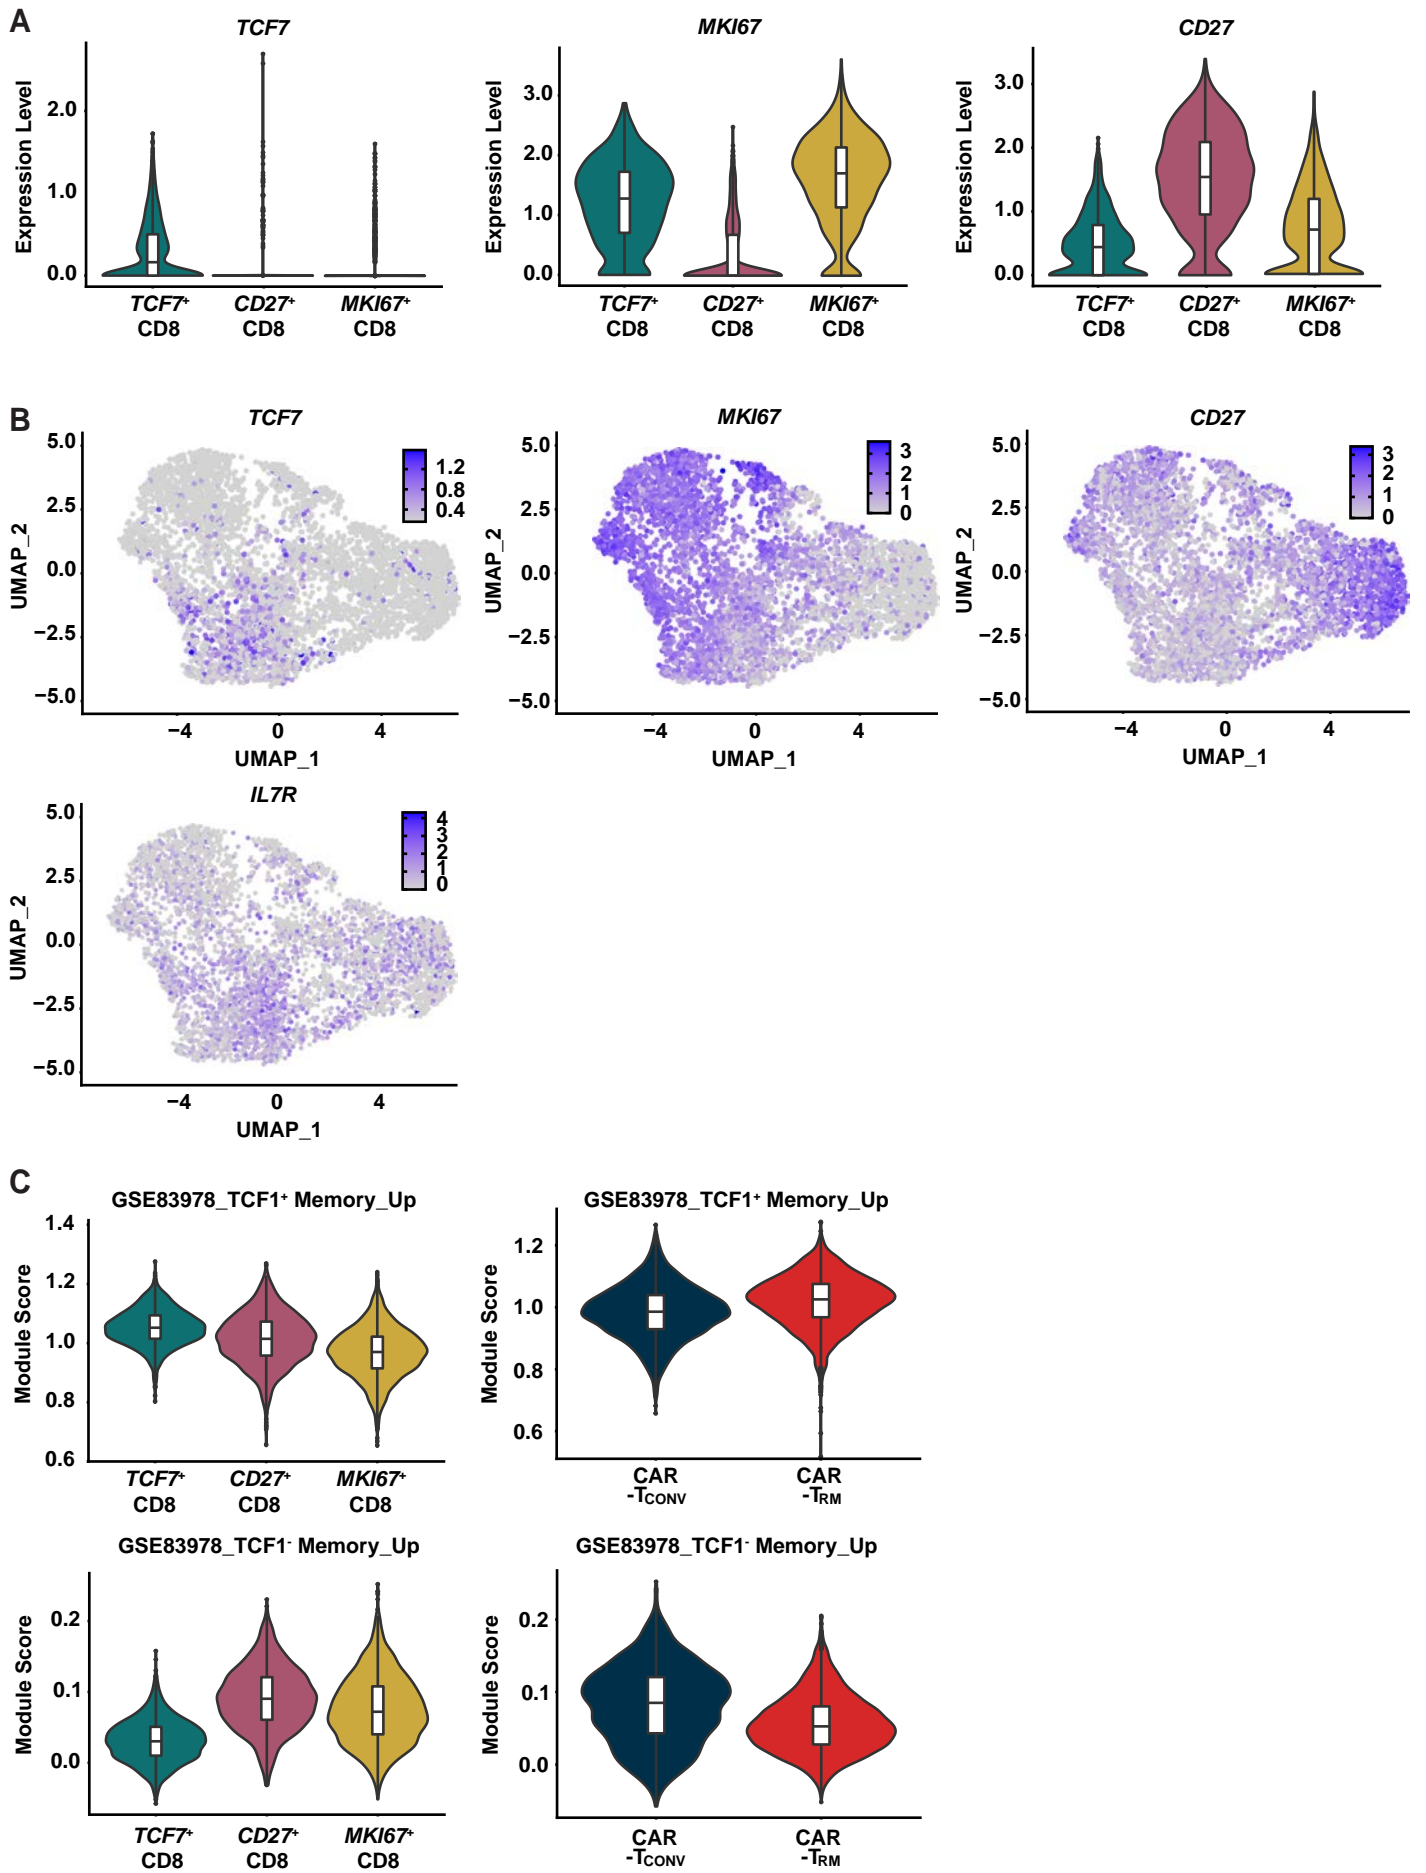



**Supplementary Figure 4. Single-cell gene expression analysis of CAR-T<sub>CONV</sub> and CAR-T<sub>RM</sub> cells. Related to Figure 3.** (A) Violin plots displaying expression of cluster-defining markers in CD8<sup>+</sup> CAR T-cells. (B) UMAP plots illustrating expression levels of the same markers in the CD8<sup>+</sup> CAR T-cell population. (C) Module scores for ‘stem-like’ (TCF1<sup>+</sup> memory CD8<sup>+</sup> T-cells) and ‘non-stem-like’ (TCF1<sup>-</sup> memory CD8<sup>+</sup> T-cells) T-cell signatures were calculated for CD8 clusters and CAR T-cell samples (GSE83978).

### CD103<sup>+</sup>CD49a<sup>+</sup>

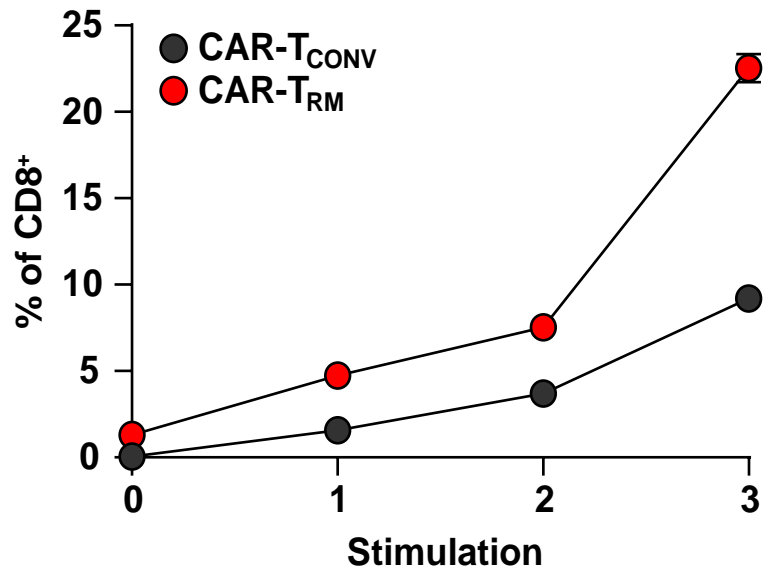

**Supplementary Figure 5. Sustained resident memory phenotype of CAR-T<sub>RM</sub> cells during chronic antigen stimulation. Related to Figure 4.** Anti-mesothelin CAR T-cells were serially challenged with AsPC1 tumor cells, and frequencies of resident memory (CD103<sup>+</sup>CD49a<sup>+</sup>CD8<sup>+</sup>) T-cells were assessed over time.

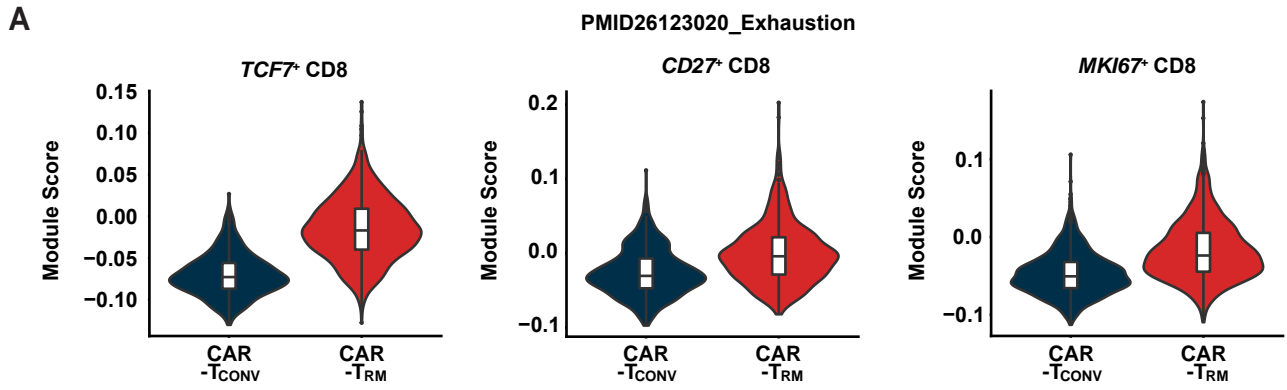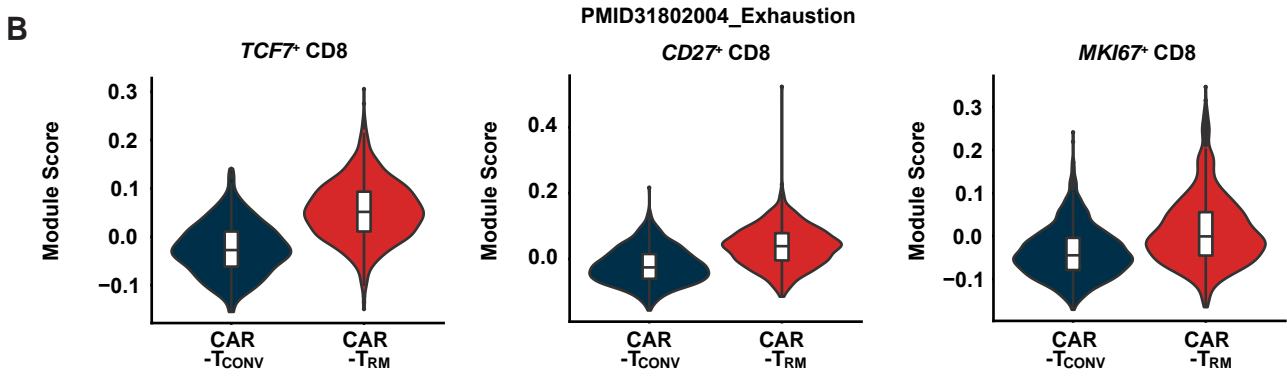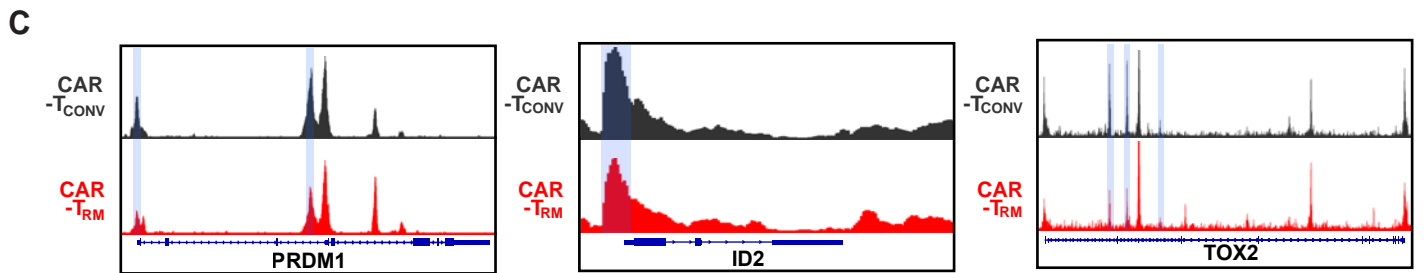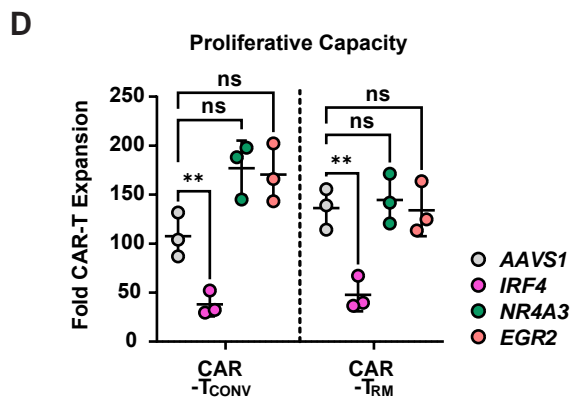

**Supplementary Figure 6. Exhaustion features in CAR-T<sub>RM</sub> cells. Related to Figure 5.**

(**A, B**) Exhaustion scores are compared between CAR-T<sub>CONV</sub> and CAR-T<sub>RM</sub> in each CD8<sup>+</sup> T-cell cluster. (**A**) PMID26123020 (**B**) PMID31802004. (**C**) ATAC-seq tracks of *PRDM1*, *ID2*, and *TOX2*. Differentially accessible regions are highlighted in blue. (**D**) M5 CAR T-cells were serially challenged with AsPC1 cells at an E:T ratio of 2:1. Fold CAR T-cell expansion after the third round of antigen stimulation is shown (two-way ANOVA,  $n = 3$  biological replicates).

\* $P < 0.05$ , \* $P < 0.01$ , \*\*\* $P < 0.001$ , ns.: not significant.

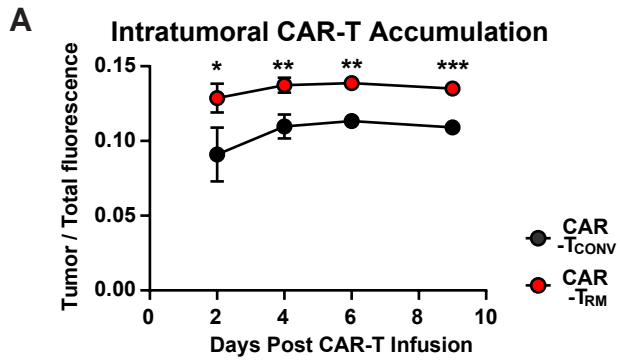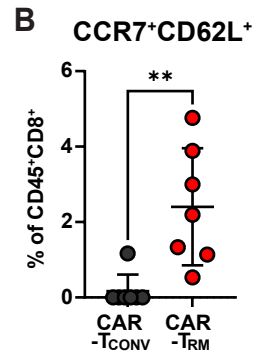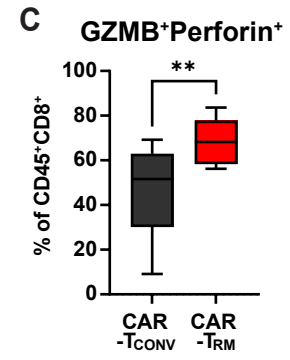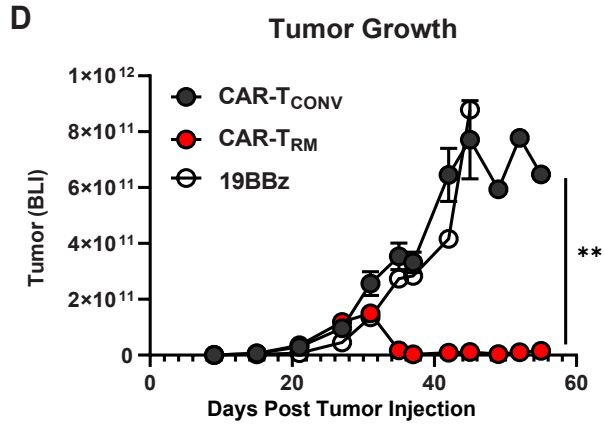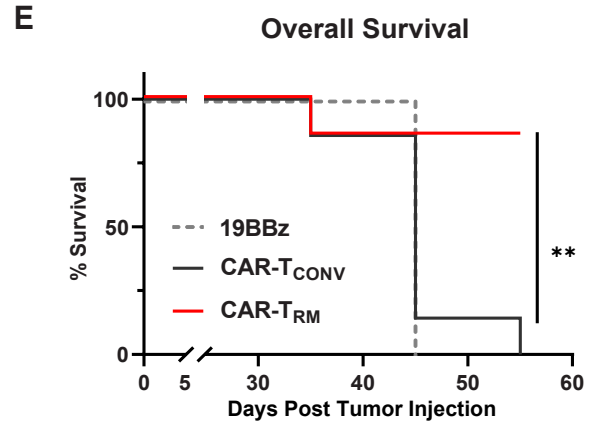

**Supplementary Figure 7. CAR-T<sub>RM</sub> cell immunophenotype and antitumor efficacy in pancreatic and prostate cancer models. Related to Figure 6.** (A-C) Capan-2 pancreatic cancer xenograft model: (A) NSG mice engrafted with  $4 \times 10^6$  Capan-2 cells received M5 CAR-T<sub>CONV</sub> and CAR-T<sub>RM</sub> cells labeled with near-infrared (NIR) fluorescent dye intravenously on day 33 post-engraftment. NIR intensity was monitored over time (Unpaired *t*-test, *n* = 3 biological replicates). (B) Frequencies of hCD45<sup>+</sup>CD8<sup>+</sup> cells in tumors expressing CCR7 and CD62L are shown (Mann-Whitney test, *n* = 7 biological replicates). (C) Tumor-infiltrating CAR T-cells were reactivated with phorbol 12-myristate 13-acetate and ionomycin, followed by measurement of effector molecule elaboration (Mann-Whitney test, *n* = 12 biological replicates). (D-E) Intraosseous PC3-PSMA prostate tumor model: (D) Male NSG mice intrafemorally engrafted with  $2 \times 10^5$  PC3-PSMA cells received  $1 \times 10^5$  anti-PSMA CAR-T<sub>CONV</sub> or CAR-T<sub>RM</sub> cells, or control CD19-targeting CAR T-cells (19BBz) intravenously on day 21 post-implantation (*n* = 7 biological replicates per group). Tumor burden was assessed by bioluminescent imaging after intraperitoneal injection of luciferin and quantification with the Xenogen IVIS Imaging System (one-way ANOVA). (E) Kaplan-Meier survival curves show prolonged survival in the CAR-T<sub>RM</sub> group compared to CAR-T<sub>CONV</sub> (Log-rank test). \**P* < 0.05, \*\**P* < 0.01, \*\*\**P* < 0.001, ns: not significant.
